# Supplementary material
Source: PubMed Central journal article supplement (PMC3195565)
Supplement: supp_M111.284281_jbc.M111.284281-1.pdf [file supp_M111.284281_jbc.M111.284281-1.pdf]

## Supplemental Figures:

**Supplemental Fig. 1.** Picture of the *E. coli* cell pellets from cells containing HT-CpeA with pPebS and either pCpeYZ (left) or pCpeS (right).

**Supplemental Fig. 2.** Immunoblot analyses of whole-cell extracts expressing HT-CpeA and HT-CpeB. To determine whether apo-HT-CpeA and apo-HT-CpeB were present in the supernatant (soluble) or in the pellet fraction (as inclusion bodies) of whole-cell extracts of *E. coli* cells grown at either 37 °C or 18 °C, cell pellets were lysed and soluble and insoluble proteins were separated by low-speed centrifugation at 10,000 × g. Samples from the supernatant (soluble) and pellet (inclusion bodies and unbroken cells) were separated by SDS-PAGE, transferred to a PVDF membrane, and probed with antibodies raised against CpeA (Panel A) or CpeB (Panel B) from *F. diplosiphon*. **Panel A:** Lanes were loaded as follows: HT-CpeA 37 °C supernatant (lane 1); HT-CpeA 37 °C insoluble pellet (lane 2); HT-CpeA 18 °C supernatant (lane 3); HT-CpeA 18 °C insoluble pellet (lane 4). **Panel B:** Lanes were loaded as follows: HT-CpeB 37 °C supernatant (lane 1); HT-CpeB 37 °C insoluble pellet (lane 2); HT-CpeB 18 °C supernatant (lane 3); HT-CpeB 18 °C insoluble pellet (lane 4). Proteins are identified to the left of each panel and with arrows.

**Supplemental Fig. 3.** Pull-down assay showing absence of a detectable interaction between CpeY and HT-CpeZ. This figure shows a Coomassie-blue stained SDS-polyacrylamide gel that was loaded with purified HT-CpeZ (lane 1); two different *E. coli* whole-cell extracts containing recombinant CpeY obtained from expression cells with pCpeY (lanes 2 and 3), the flow-through from metal affinity chromatography of an interaction assay (the same assay as shown in lane 2) between HT-CpeZ and CpeY extract (lane 4); and the eluate from this interaction assay between HT-CpeZ and CpeY extract (lane 5). Lane S shows the molecular mass standards at left. Arrows at the right show the expected migration positions of CpeY and HT-CpeZ.

**Supplemental Fig. 4.** Chromatogram of a tryptic digest of HT-CpeA-PEB purified from cells containing pCpeA, pCpeYZ, and pPebS separated on a C<sub>18</sub> RP-HPLC column.

**Supplemental Fig. 5.** Mass spectrometric analyses of low abundance tryptic peptide of HT-CpeA-PEB produced with CpeY/CpeZ **A.** MALDI MS/MS spectrum of the precursor ion at  $m/z$  1089, which was deduced to be a peptide fragment with a covalently bound PEB chromophore. This peptide binding PEB was derived from trypsin digestion of the HT-CpeA-PEB produced in the presence of CpeY and CpeZ. The MS/MS spectrum contains a peak of interest at  $m/z$  503. The peak, resulting from a neutral loss of 586, was attributed to a peptide containing a cysteine at position 139. The sequence of the peptide is (R) GCAPR (D). The peak corresponding to protonated PEB, which is detected at  $m/z$  587, was not detected in the spectrum shown in this figure. Nonetheless when applying a higher acceleration voltage the peak is visible. **B.** Peak assignments of product ion spectrum corresponding to the precursor protonated PEB-peptide (derived from CpeA) complex. A tick mark prior to number, e.g., '803, indicates that one hydrogen has been transferred to the departing neutral ion upon cleavage. A tick mark after a number, e.g., '969', indicates the transfer of one hydrogen to the formed ion. A dot (·) indicates a radical ion.

**Supplemental Fig. 6.** Tryptic digest of HT-CpeB-PEB purified from cells containing pCpeB, pCpeS, and pPebS. The chromatogram represents sample separated on a C<sub>18</sub> RP-HPLC column.

**Supplemental Fig. 7.** **A.** MALDI MS/MS spectrum of the precursor ion at  $m/z$  1250, which was deduced to be a peptide fragment with a covalently bound PEB chromophore, and which was derived from trypsin digestion of the HT-CpeB-PEB produced in the presence of CpeS. The MS/MS spectrum contains two peaks of interest at  $m/z$  664 and  $m/z$  587. The peak at  $m/z$  664 was attributed to a peptide containing a cysteine at position 80. The sequence of the peptide is (R) MAACLR (D). The second peak at  $m/z$  587 was attributed to protonated PEB. **B.** Peak assignments of product ion spectrum corresponding to the precursor protonated PEB-peptide (derived from CpeB) complex. A tick mark prior to number, e.g., '964, indicates that one hydrogen has been transferred to the departing neutral ion upon cleavage. A tick mark after a number, e.g., 1129', indicates the transfer of one hydrogen to the formed ion. A dot (·) indicates a radical ion.

**Supplemental Fig. 8.** Analyses of HT-CpeA-PCB produced in the presence of pPcyA and pCpeYZ **A.** Absorbance (solid line) and fluorescence emission (dashed line) spectra of HT-CpeA purified from cells containing pCpeA, pPcyA with pCpeYZ and absorbance (dashed dotted line), fluorescence (dotted line) without pCpeYZ are shown. **B.** Coomassie-blue-stained SDS polyacrylamide gel containing HTCpeA purified from cells containing pCpeA, pPcyA (lane 1) and pCpeA, pPcyA, pCpeYZ (lane 2). Position of a molecular mass standard is indicated to the right. **C.** Zn-enhanced fluorescence image of the gel pictured in panel **B**.

**Supplemental Fig. 9.** Amino acid sequence alignment between CpeY from *F. diplosiphon* (called Fd in the figure), a fusion of CpcE with CpcF from *Synechocystis* sp. PCC 6803 (called PCC6803 CpcEF), and RpcG from *Synechococcus* WH8102 (called WH8102 RpcG). The CpcE/CpcF proteins were combined to form one concatenated protein. The software used was MacVector 9.0. Dark shading indicates identical residues and light shading indicates similar residues.

**Supplemental Table 1:** Plasmids used in this study

| Plasmid Name            | Recombinant proteins produced <sup>a</sup>                                                 | Parent vector | Antibiotic <sup>b</sup> | Reference  |
|-------------------------|--------------------------------------------------------------------------------------------|---------------|-------------------------|------------|
| <b>pPebS</b>            | Myovirus HO1 and HT-PebS                                                                   | pACYCDuet-1   | Cm                      | (1)        |
| <b>pPcyA</b>            | PcyA from <i>Synechococcus</i> sp. PCC 7002 and Ho1 from <i>Synechocystis</i> sp. PCC 6803 | pACYCDuet-1   | Cm                      | (2)        |
| <b>pCpeA</b>            | <i>F. diplosiphon</i> HT-CpeA                                                              | pETDuet-1     | Ap                      | This paper |
| <b>pCpeA:C82S</b>       | <i>F. diplosiphon</i> HT-CpeA (Cys <sup>82</sup> mutated to Ser)                           | pETDuet-1     | Ap                      | This paper |
| <b>pCpeA:C139S</b>      | <i>F. diplosiphon</i> HT-CpeA (Cys <sup>139</sup> mutated to Ser)                          | pETDuet-1     | Ap                      | This paper |
| <b>pCpeA:C82S/C139S</b> | <i>F. diplosiphon</i> HT-CpeA (Cys <sup>82</sup> and Cys <sup>139</sup> mutated to Ser)    | pETDuet-1     | Ap                      | This paper |
| <b>pCpeB</b>            | <i>F. diplosiphon</i> HT-CpeB                                                              | pETDuet-1     | Ap                      | This paper |
| <b>pCpeB:C80S</b>       | <i>F. diplosiphon</i> HT-CpeB (Cys <sup>80</sup> mutated to Ser)                           | pETDuet-1     | Ap                      | This paper |
| <b>pCpeB:C165S</b>      | <i>F. diplosiphon</i> HT-CpeB (Cys <sup>165</sup> mutated to Ser)                          | pETDuet-1     | Ap                      | This paper |
| <b>pCpeB:C48S/C59S</b>  | <i>F. diplosiphon</i> HT-CpeB (Cys <sup>48</sup> and Cys <sup>59</sup> mutated to Ser)     | pETDuet-1     | Ap                      | This paper |
| <b>pCpeZ</b>            | <i>F. diplosiphon</i> , HT-CpeZ                                                            | pCOLADuet-1   | Km                      | This paper |
| <b>pCpeY</b>            | <i>F. diplosiphon</i> CpeY                                                                 | pCOLADuet-1   | Km                      | This paper |
| <b>pCpeYZ</b>           | <i>F. diplosiphon</i> HT-CpeZ and CpeY                                                     | pCOLADuet-1   | Km                      | This paper |
| <b>pCpeS</b>            | <i>F. diplosiphon</i> CpeS                                                                 | pCOLADuet-1   | Km                      | This paper |

<sup>a</sup> Proteins produced as Hexa-histidine-tagged fusions are indicated as HT-

<sup>b</sup> Antibiotic resistance used to select for the presence of the plasmid (Ap: ampicillin; Cm: chloramphenicol; Km: kanamycin; Sp: spectinomycin)

1. Dammeyer, T., Bagby, S. C., Sullivan, M. B., Chisholm, S. W., and Frankenberg-Dinkel, N. (2008) *Curr. Biol.* **18**, 442-448
2. Biswas, A., Vasquez, Y. M., Dragomani, T. M., Kronfel, M. L., Williams, S. R., Alvey, R. M., Bryant, D. A., and Schluchter, W. M. (2010) *Appl. Environ. Microbiol.* **76**, 2729-2739

**Supplemental Table 2.****Oligonucleotide primers used in this paper (Engineered restriction enzyme sites are underlined)**

| Primer Name       | Sequences                                                      |
|-------------------|----------------------------------------------------------------|
| cpeAF             | 5'-AAGGATCCGATGAATCAGTTGTTACCACCGT-3'                          |
| cpeAR             | 5'-AAGAATTCCTAGGAGAGAGAGTTAATAGCGTA-3'                         |
| cpeBF             | 5'-AAGGATCCGATGCTTGATGCTTTTTCTAGAGC-3'                         |
| cpeBR             | 5'-CCGAATTCCTAGCTCAAAGCAGAGATTACGCG-3'                         |
| cpeZF             | 5'-CCGGATCCGATGCCGACAACAGAAGAAGAACTATTCCAA-3'                  |
| cpeZR             | 5'-CCGAATTCCTATTTTTCTCCCCGCTGAAACTT-3'                         |
| cpeYF             | 5'-ACAAGGAGCTTGCAATATGGATAAGCGCTTTTTT-3'                       |
| cpeYR             | 5'-AACTCGAGGGCTGTGATTTCTTGATTTTTTCAGGGT-3'                     |
| cpeSF             | 5'-CAAATAGCTAAAACATATGGAAACCAAAGTGTTG-3'                       |
| cpeSR             | 5'-AACTGCAGCTAGGCACCAGTGTTTATG-3'                              |
| CpeA (C82S)       | 5' CCTTCAAAGCTAAGTCCGCTCGTGACATC-3'                            |
| CpeA (C139S)      | 5'- CGTAACCGTGGTTCTGCACCTCGTGATATG-3'                          |
| pETDuet(XhoI del) | 5'-ACGTCGGTACCCTCCAGTCTGGTAAAGAAACCGCTG-3'                     |
| CpeB (C80S)       | 5'-CGTATGGCTGCCTCCTTACGCGATGCA-3'                              |
| CpeB (C165S)      | 5'-GTTGAAGATCGTTCCGCTAGCTTAGTT-3'                              |
| CpeB (C48S, C59S) | 5'-GCTAGCTCCATGGTTTCTGATGCGTAGC<br>TGGAATGATCTCCGAAAACCAAGGT-3 |

Sup. Fig. 1

CpeA/CpeYZ/PebS

CpeA/CpeS/PebS

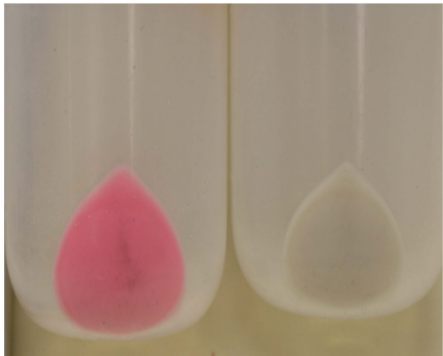

**Sup. Fig.2**

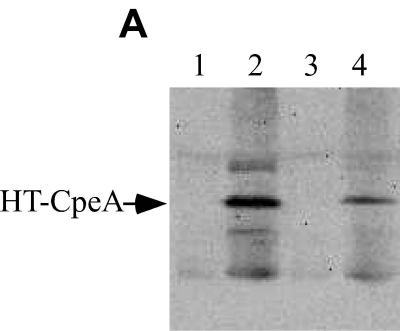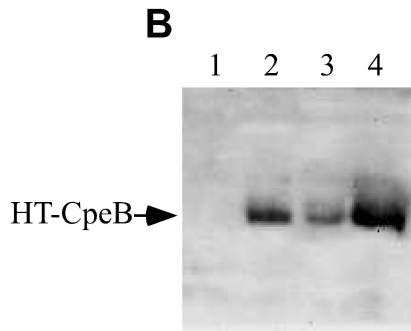

Sup. Fig. 3

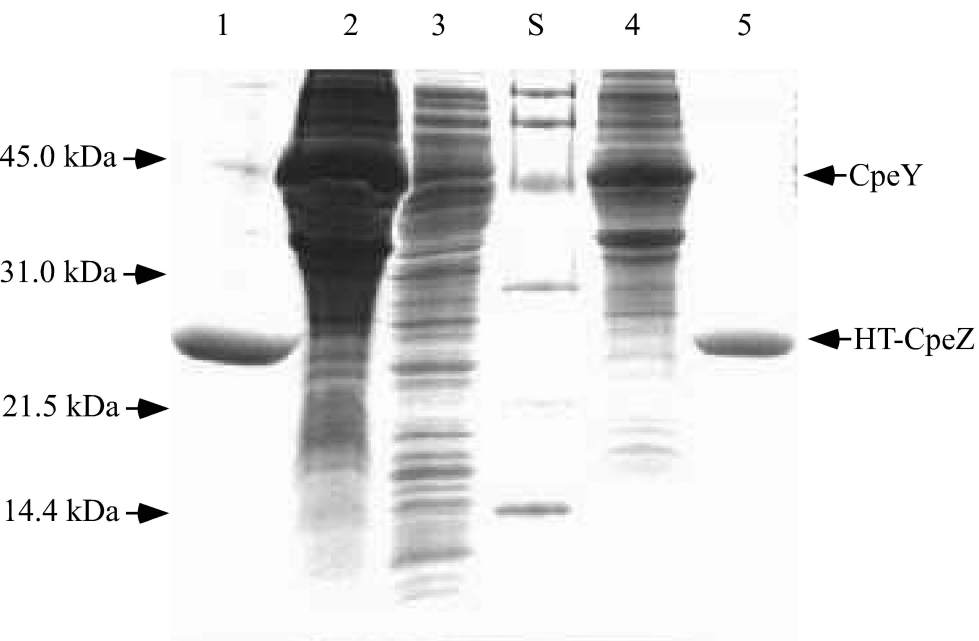

Sup. Fig. 4

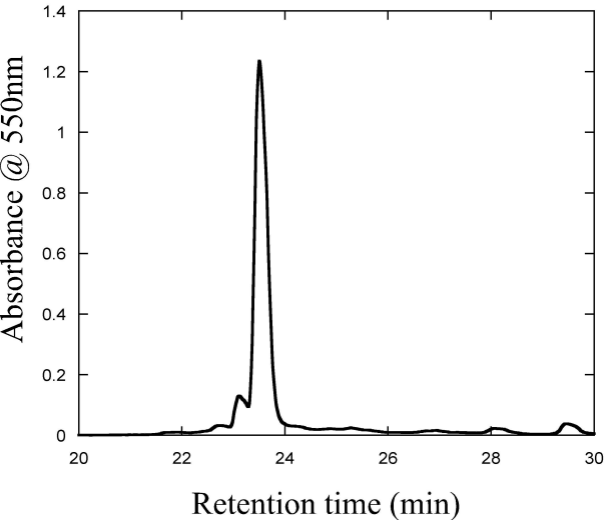



Sup. Fig. 5

A

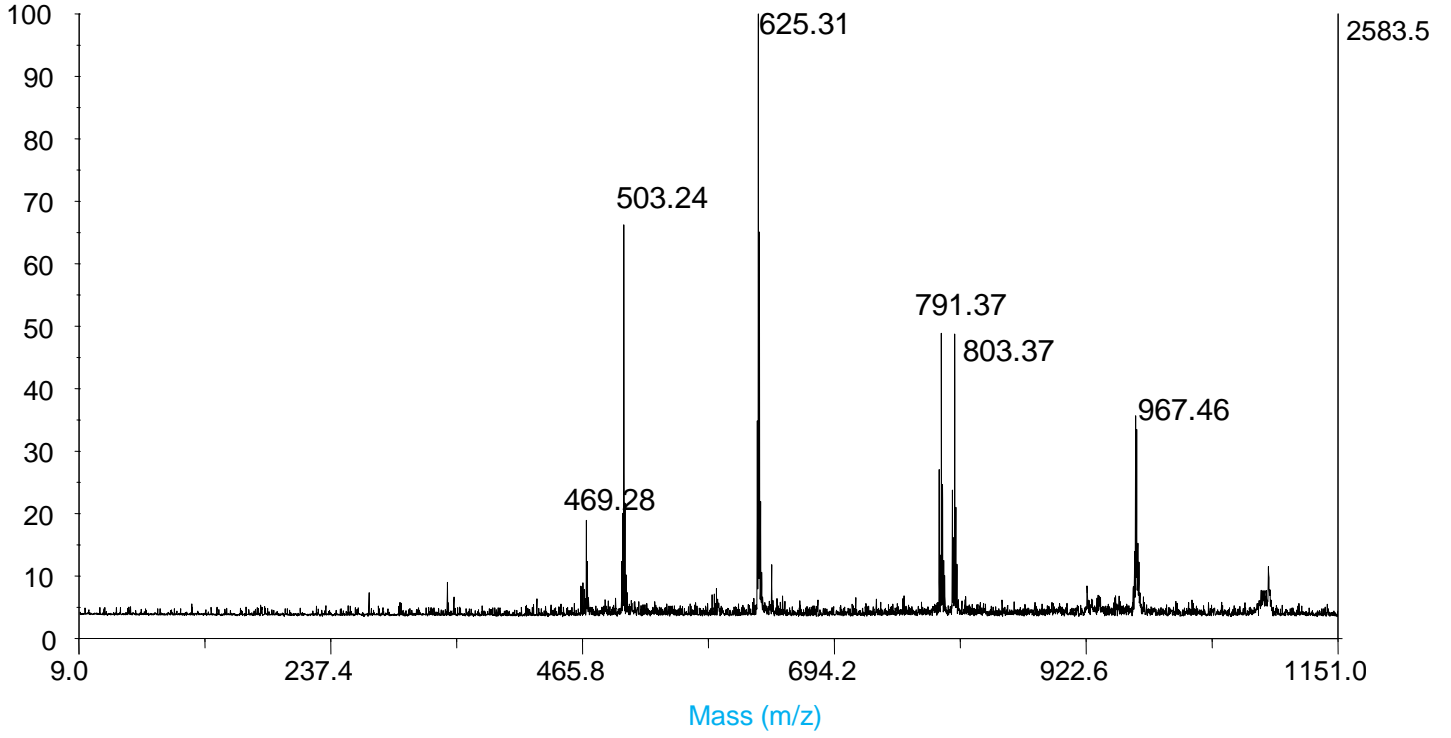

B

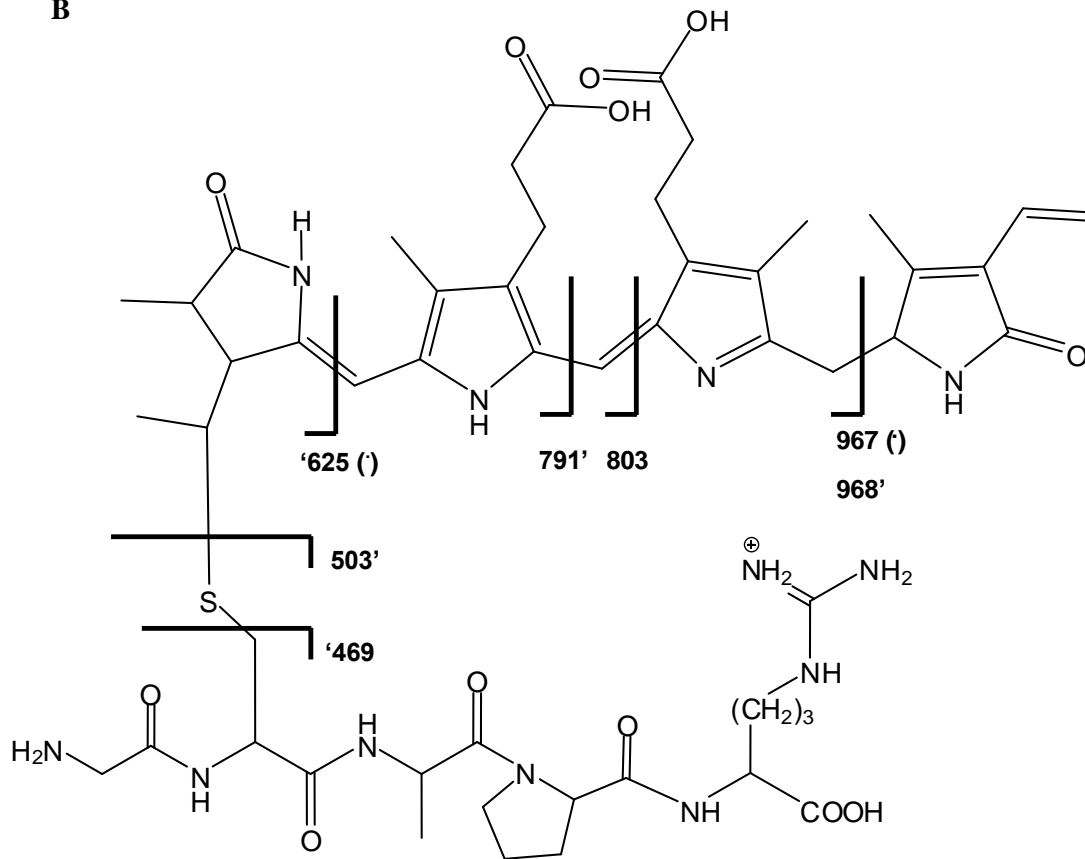

Sup. Fig. 6

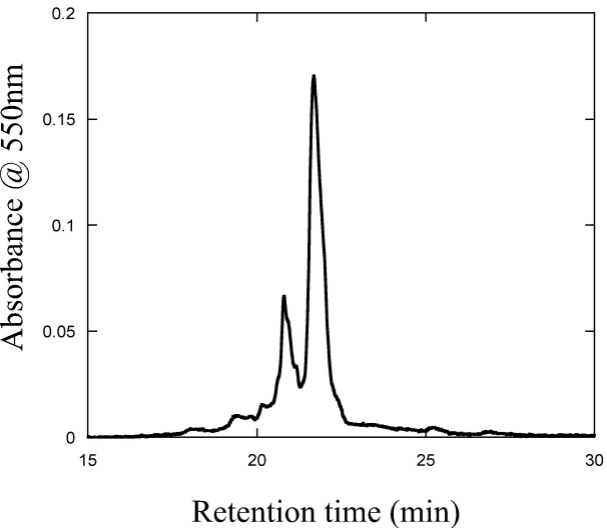

Sup. Fig. 7

A

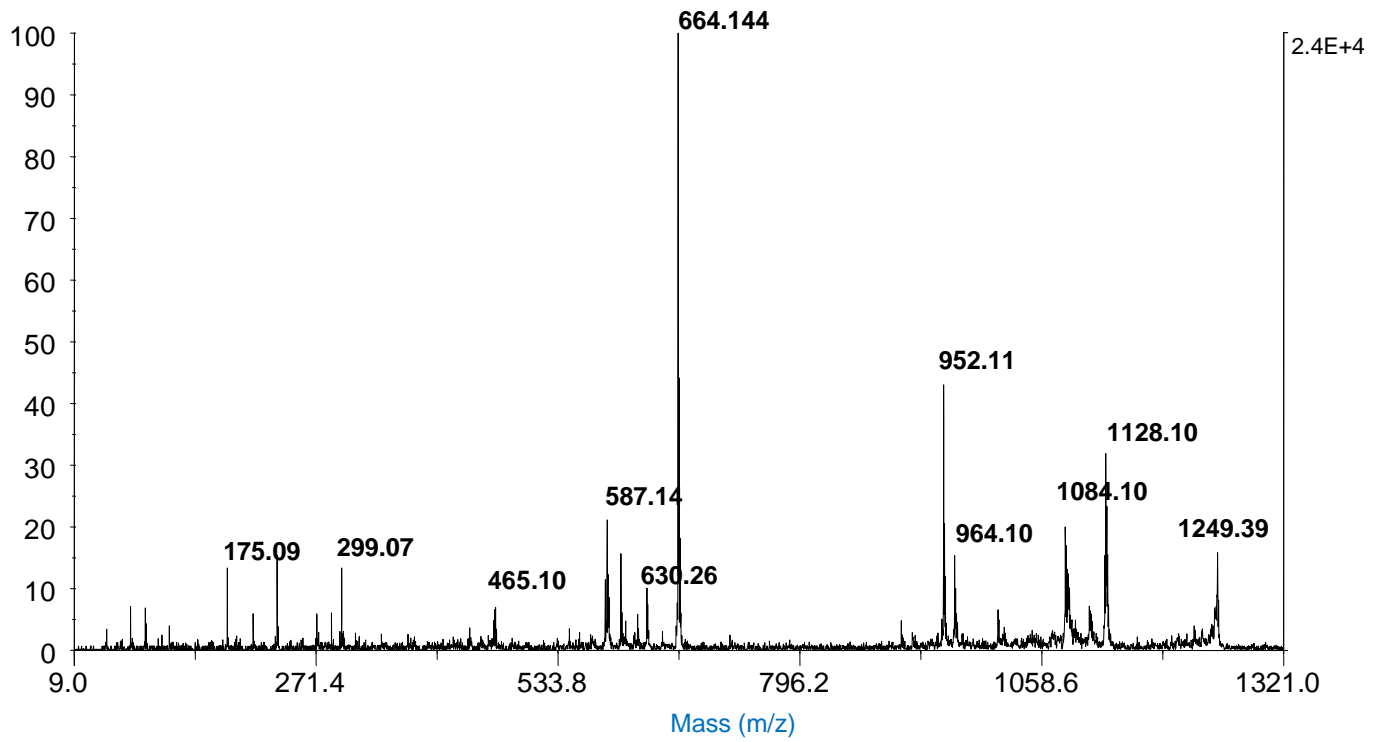

B

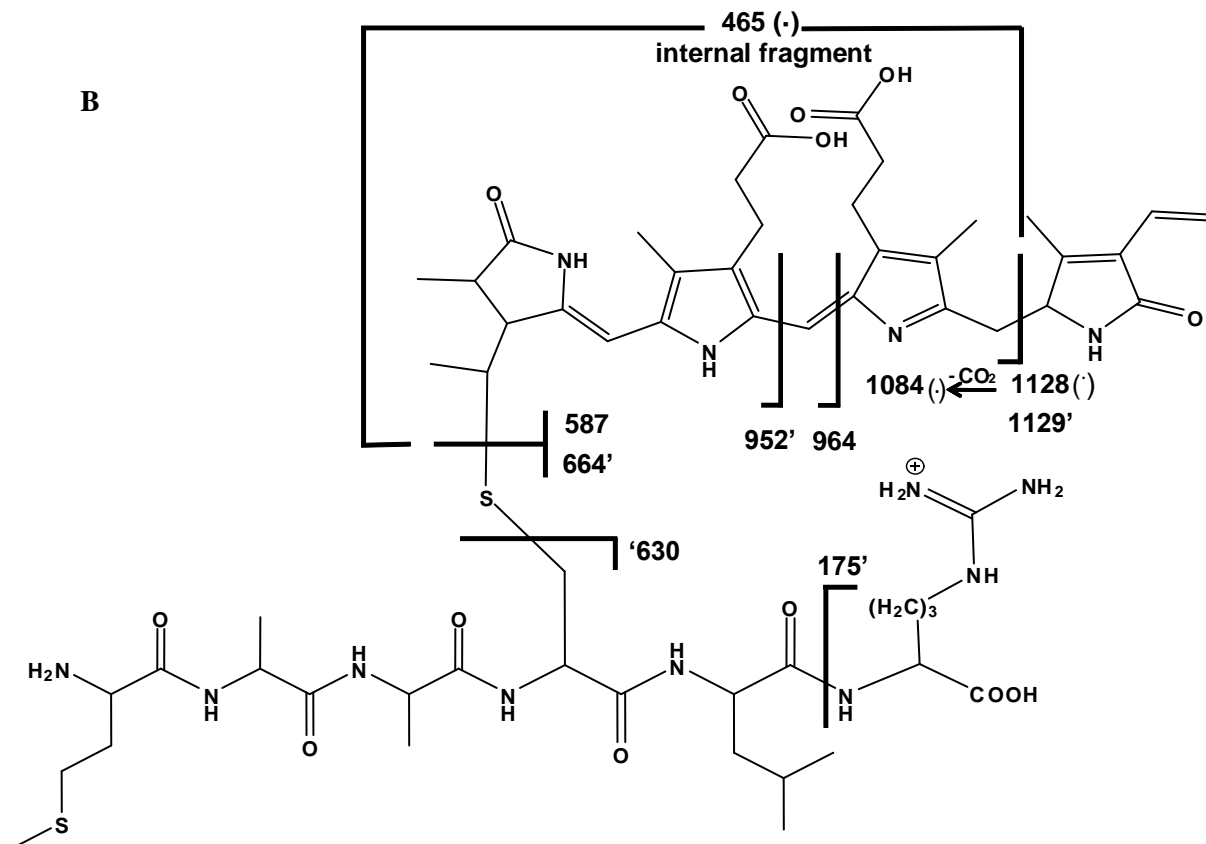

Sup. Fig. 8

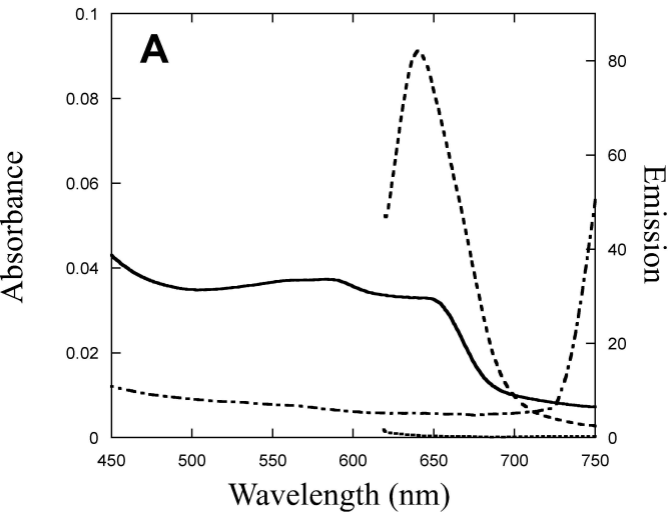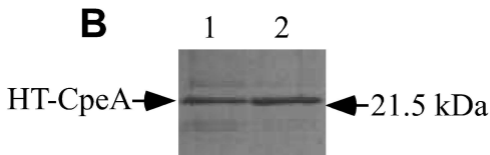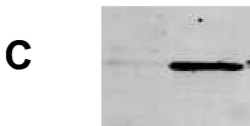

Supplemental Fig. 9

Fd CpeY 1 **M**DKRFFNFNLT**E**DQAIALLD**T**P**Q**DQL**S**END**S**RY**I**AAS**H**L**V**N**F**P--**T**ER**S** 48  
PCC6803 CpcEF 1 M**S**EPN**L**N**P**AY**T**L**D**QA**I**AN**L**Q**Q**T-----**E**DA**S**AR**Y**Y**A**AW**W**I**G**R**F**RA**A**Q**P**ET 45  
WH8102 RpcG 1 M**P**ID**S**VT**A**AL**E**AL**D**H-----**Q**DA**G**VR**Y**H**G**AW**W**L**G**K**N**R--**S**IA**E**G 36

Fd CpeY 49 **I**N**A**L**I**R**A**V**Q**-**Q**T**D**P**S**L**D**N-**R**I**V**RR**K**S**V**ET**L**G**R**L**K**AT**T**AL**P**F**I**R**I**C**L**F**D**ED 96  
PCC6803 CpcEF 46 **I**A**A**L**L**V**A**L**E**DE**T**DR**S**P**D**GG**Y**PL**R**RR**N**AA**K**AL**G**K**L**G**D**R**Q**V**V**PA**L**I**K**AL**E**CE**D** 95  
WH8102 RpcG 37 **V**P**R**L**V**E**C**LL**D**ER**D**K**T**CT**G**GG**Y**PL**R**RR**Q**AAR**S**L**G**M**I**K**D**S**R**CL**P**EL**L**K**T**LE**T**DD 86

Fd CpeY 97 **C**Y**T**V**E**NA**A**W**A**IG**E**IG**T**Q**D**T**D**IL**E**D**V**A**Q**L**L**E-----**K**P**G**Q-----**T**Y**R** 133  
PCC6803 CpcEF 96 **Y**Y**V**RE**S**AA**Q**AL**E**GL**G**-**D**AR**A**MA**P**L**M**AK**L**T**G**GL**A**AA**Q**L**V**E**G**K**P**HL**A**Q**P**Y**E** 143  
WH8102 RpcG 87 **V**Q**L**HE**A**T**L**R**A**L**I**Q**I**K--**S**D**Q**C**S**S**S**L**I**N**Y**L**D**-----**R**D**I**P**N**K-----**P**I**E** 123

Fd CpeY 134 **V**I**I**H**T**L**T**K**F**N**Y**Q**P**AL**E**R**I**R**K**F**V**ND**S**D**P**P**T**A**S**AA**I**AA**V**C**R**L**T**G**D**Y**S**Q**M**AK**V** 183  
PCC6803 CpcEF 144 **A**I**I**E**A**L**G**T**L**Q**A**VE**S**I**G**L**I**E**P**FL**E**H**F**S**P**K**V**Q**Y**AAA**R**AL**F**Q**L**T**G**D**N**RY**G**DL**L** 193  
WH8102 RpcG 124 **A**L**I**E**A**L**T**E**Q**RM**W**D**V**SE**K**I**Q**P**F**L**N**D**K**S**E**R**I**A**G**S**A**AA**F**F**Y**S**Y**T**G**EM**T**Y**L**N**K**V 173

Fd CpeY 184 **V**Q**I**L**Q**H**P**N**V**L**G**RR**L**S**I**Q**D**LM**D**AR**Y**Y**D**A**I**P**D**I**A**K**C**P**V**S**L**V**F**R**L**R**G**L**R**T**L**A**E** 233  
PCC6803 CpcEF 194 **I**T**A**L**G**G**T**D**L**Q**L**RR**S**AM**M**DL**G**AT**G**Y**L**P**G**A**Q**A**I**A**K**A**F**A**E**NS**L**K**L**I**A**LR**D**DL**W**A 243  
WH8102 RpcG 174 **I**S**L**L**D**H**Q**N**R**F**I**R**Q**S**A**A**F**DL**A**R**I**G**T**I**K**A**T**D**P**L**T**A**K**I**P**NN**V**K**M**F**A**I**K**A**I**LN 223

Fd CpeY 234 **A**G**I**SE**G**-----**A**IT**F**AK**I**Q**P**Y**L**E**Q**T**L**Y**D**HP**Q**D**L**N**L**V**H**S**Y**DR**L**PT**L**E**I**L**I**R**G** 279  
PCC6803 CpcEF 244 **T**H**R**Q**R**Q-----**A**SS**E**SK**A**L**S**PA**S**R**Q**I**L**EL**M**DS**L**ME**G**NS**-**V**V**T**P**E**I**ER**L**I**Q**A 289  
WH8102 RpcG 224 **K**S**L**SR**S**N**Q**AD**S**IP**D**T**D**LA**S**I**H**S**L**LF**K**AL**D**SL**A**RD**N**FS**G**N**L**L**I**E**Q**D**N**Q**I**PE 273

Fd CpeY 280 **L**Y**E**T**D**-----**F**GR**C**Y**L**AT**K**T-----**I**LE**H**Y**A**D**A**AE**A**L**F**A**T**Y**A**A 313  
PCC6803 CpcEF 290 **V**ET**A**DS**A**AK**L**V**G**AV**R**AL**A**AT**R**SP**L**AV**P**Q**L**T**T**V**L**R**Y**NN**P**G--**A**VA**A**VD**G**L 337  
WH8102 RpcG 274 **T**Y**P**GD**G**ST**E**SD**L**LS**N**A**F**D**N**L**R**SP**S**L**T**SR**K**S**G**I**K**Q**L**VR**G**A**N**R**F**K**I**D**L**LD**L**Y 323

Fd CpeY 314 **E**AN**N**D**Y**GA**H**F**H**V**I**K**L**F**G**W**L**K**H**A**P**AY**D**L**I**VE**G**L**H**N**K**Q**P**-----**Q**F 352  
PCC6803 CpcEF 338 **I**Q**I**GD**A**AM**T**H-**L**LAN**M**D**G**Y**N**Y**G**AR**A**WA**T**RA**C**AG**I**GD**P**RA**L**ALL**Q**E**A**AL**T**D 386  
WH8102 RpcG 324 **F**SE**S**D**Q**D**I**T**M**G**L**I**K**AM**A**E**L**K**N**PH**Y**AN**A**L**I**DA**I**GV**E**IG-----**N**H 362

Fd CpeY 353 **Q**K**S**--**R**AAAA**I**AL**A**EL**G**DP**K**A**I**P**E**L**K**-----**A**CL**E**T**K**I**W**DL**K** 387  
PCC6803 CpcEF 387 **F**AL**S**VR**R**AA**K**GL**G**FL**R**W**Q**SL**P**Q**E**E**Q**ET**V**Q**K**A**I**Y**D**T**L**I**Q**V**C**ED**P**E--**W**V**V**R 435  
WH8102 RpcG 363 **C**Q**G**N**I**RR**V**AA**C**AL**G**DI**N**W**N**A**K**I**S**S**Q**S---**L**H**A**V**F**N**K**L**K**W**T**L**H**S**P**ED**W**GL**R** 409

Fd CpeY 388 **Y**AT**L**M**A**LE**K**L**G**D**I**SE**H**K**Q**A-----**A**Q**D**S-----**D**WL**I**AR**K**AS**S**T**L**K**N** 424  
PCC6803 CpcEF 436 **Y**GA**I**AG**L**EN**L**AK**Q**A**Q**H**Y**R**Q**---**P**L**K**D**F**L**Q**S**F**VE**Q**E**P**E**A**IV**G**ER**I**L**W**T**L**EN 482  
WH8102 RpcG 410 **Y**S**A**C**L**A**L**E**G**I**G**N**A**DS**I**K**L**NE**A**K**A**KE**T**DP**V**LS**A**R**L**D**K**A**I**L**K**S**K**N**K**T**S**I**H** 459

Fd CpeY 425 **Q**E**I**T**A** 429  
PCC6803 CpcEF 483 **I**G**P**I 486  
WH8102 RpcG 460 **I**E**N**K**K**V**L** 466
